# Supplementary material for: Conservation of Native Wild Ivory-White Olives from the MEDES Islands Natural Reserve to Maintain Virgin Olive Oil Diversity
Source: PubMed Central journal article supplement (PMC7603032; doi:10.3390/antiox9101009), 2020-10-17
Supplement: antioxidants-09-01009-s001.pdf [file antioxidants-09-01009-s001.pdf]

Table S1 Multiple reaction monitoring conditions for the polyphenols

| <b>Phenolic compounds</b> | <b>m/z</b> | <b>DP</b> | <b>FP</b> | <b>EP</b> | <b>CE</b> | <b>RT</b> |
|---------------------------|------------|-----------|-----------|-----------|-----------|-----------|
| Oleuropein A              | 377/241    | -30       | -140      | -10       | -30       | 9.14      |
| HDCM OA                   | 335/199    | -30       | -140      | -10       | -30       | 7.32      |
| Lactone                   | 321/185    | -40       | -250      | -10       | -20       | 7.16      |
| Ligstroside A             | 361/291    | -30       | -140      | -10       | -30       | 9.01      |
| Oleocanthal               | 303/285    | -40       | -170      | -5        | -10       | 5.92      |
| Elenolic acid             | 241/127    | -30       | -140      | -10       | -30       | 6.31      |
| Hydroxyelenolic acid      | 257/137    | -30       | -140      | -10       | -30       | 6.02      |
| Luteolin                  | 285/133    | -100      | -340      | -10       | -50       | 8.15      |
| Apigenin                  | 269/117    | -70       | -200      | -10       | -50       | 9.11      |
| Hydroxytyrosol            | 153/123    | -40       | -250      | -10       | -20       | 1.13      |

DP: declustering potential; FP: focusing potential; EP: entrance potential; CE: collision energy;  
RT: retention time
